# Supplementary material
Source: Research Square preprint supplement (doi:10.21203/rs.3.rs-9510034/v1)
Supplement: Supplementary file 1 [file dd37889cadba6ca988662604.docx]

**Figure S1.** **Sensitivity analysis of epigenetic age acceleration across diagnostic groups.**


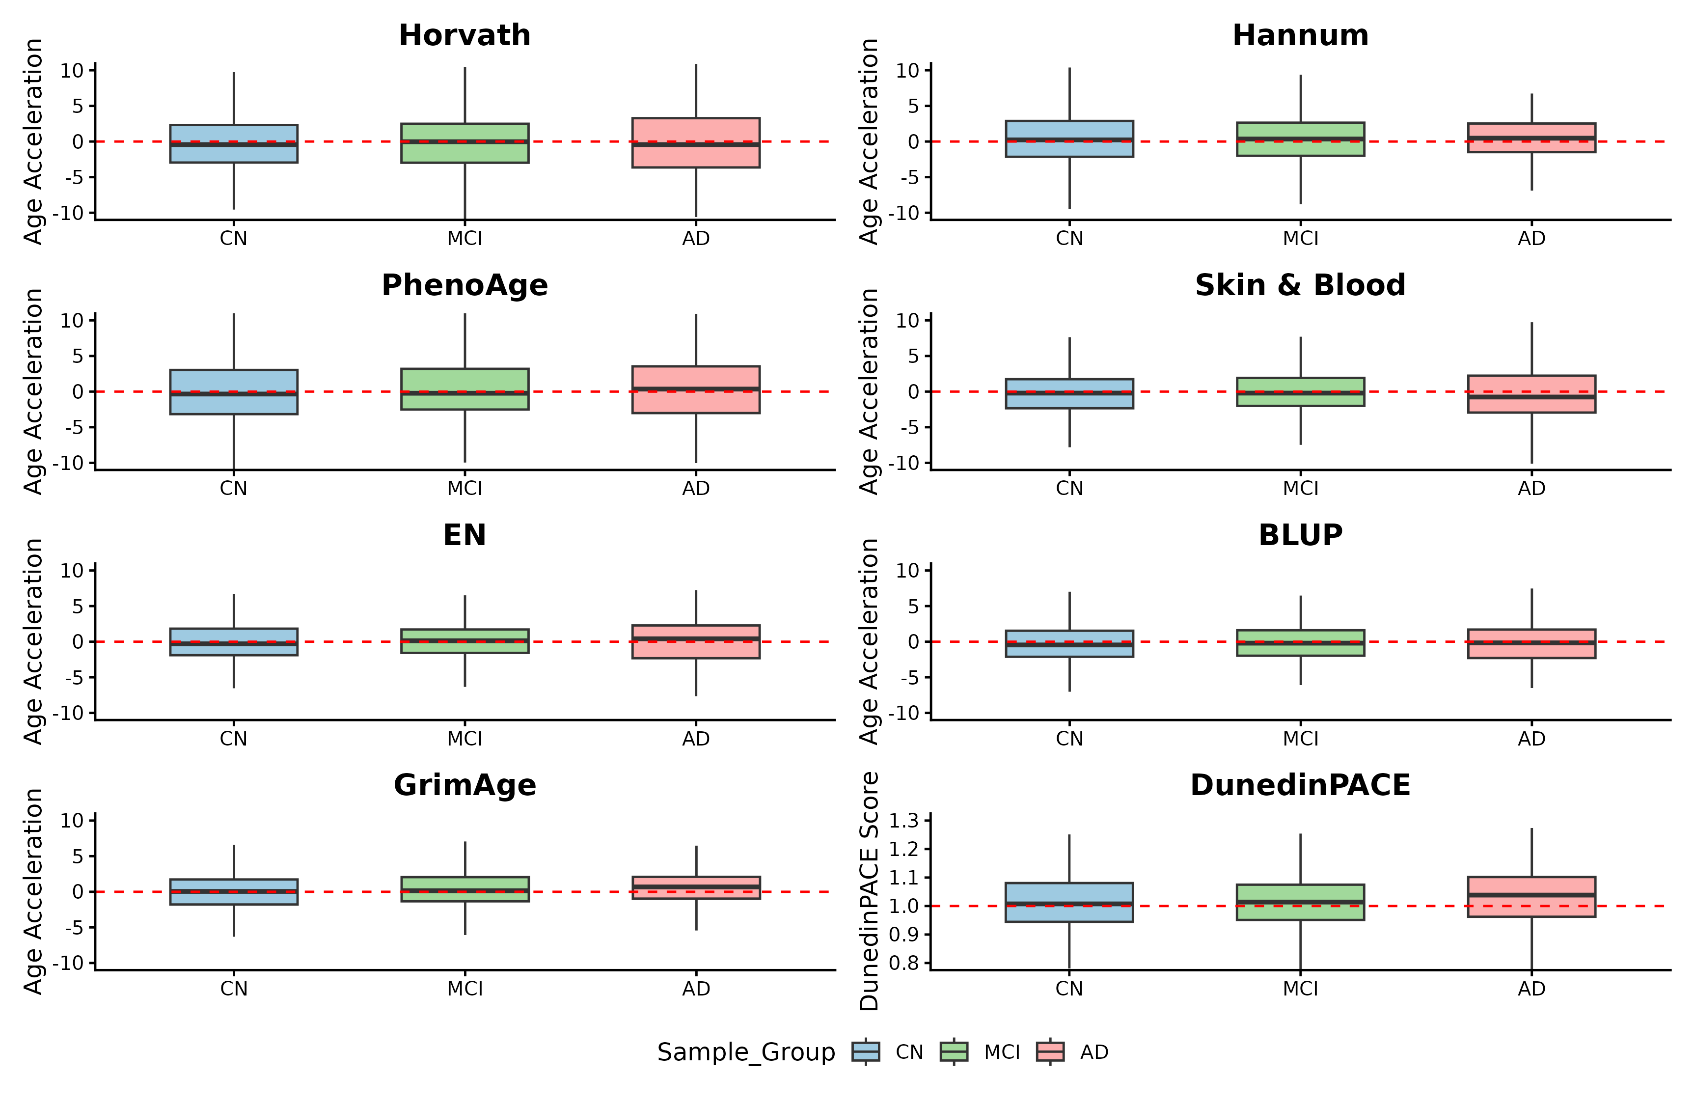


Distribution of epigenetic age acceleration across diagnostic groups after batch correction. Patterns are consistent with primary analyses.

**Figure S2. Sensitivity analysis of differential methylation across diagnostic groups.**

**
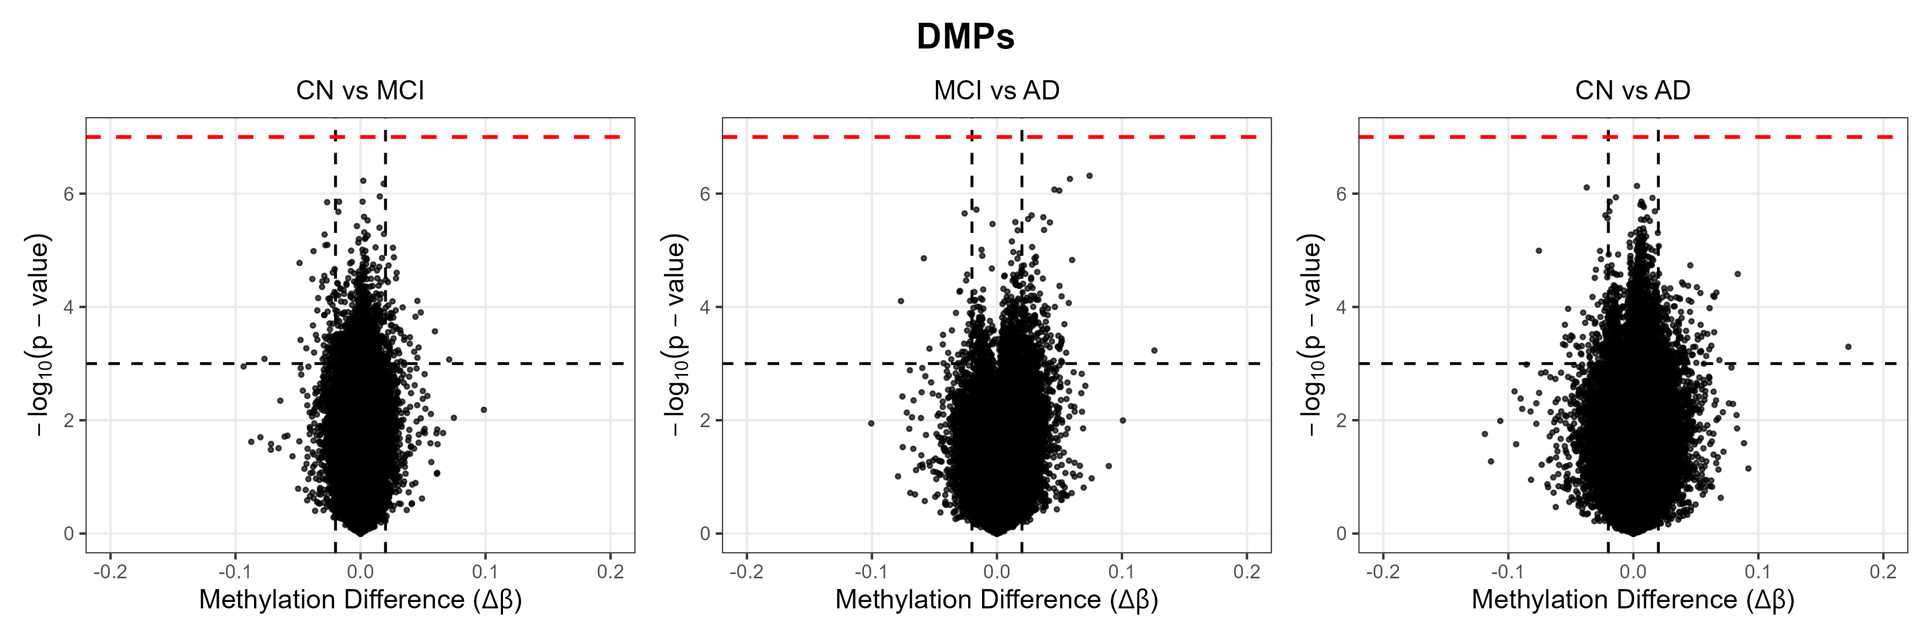
**

Volcano plots showing differential methylation after batch correction. No CpG sites remained significant after multiple testing correction.

**Table S1. Associations between principal components and technical and biological variables.**

| **PC** | **Term** | **N** | **p_ANOVA** | **p_KW** | **p_ANOVA_FDR** | **p_KW_FDR** |
| --- | --- | --- | --- | --- | --- | --- |
| **PC1** | Sample_Group | 639 | 0.748 | 0.611 | 0.748 | 0.655 |
| **PC2** | Sample_Group | 639 | 0.726 | 0.902 | 0.748 | 0.902 |
| **PC3** | Sample_Group | 639 | 0.283 | 0.312 | 0.472 | 0.520 |
| **PC4** | Sample_Group | 639 | 0.123 | 0.217 | 0.416 | 0.520 |
| **PC5** | Sample_Group | 639 | 0.319 | 0.297 | 0.478 | 0.520 |
| **PC6** | Sample_Group | 639 | 0.038 | 0.110 | 0.416 | 0.520 |
| **PC7** | Sample_Group | 639 | 0.477 | 0.565 | 0.650 | 0.655 |
| **PC8** | Sample_Group | 639 | 0.620 | 0.578 | 0.748 | 0.655 |
| **PC9** | Sample_Group | 639 | 0.109 | 0.167 | 0.416 | 0.520 |
| **PC10** | Sample_Group | 639 | 0.715 | 0.386 | 0.748 | 0.579 |
| **PC11** | Sample_Group | 639 | 0.245 | 0.458 | 0.472 | 0.625 |
| **PC12** | Sample_Group | 639 | 0.283 | 0.228 | 0.472 | 0.520 |
| **PC13** | Sample_Group | 639 | 0.167 | 0.293 | 0.417 | 0.520 |
| **PC14** | Sample_Group | 639 | 0.139 | 0.091 | 0.416 | 0.520 |
| **PC15** | Sample_Group | 639 | 0.068 | 0.056 | 0.416 | 0.520 |

**Table S1. (Cont.) Associations between principal components and technical and biological variables.**

| **PC** | **Term** | **N** | **p_ANOVA** | **p_KW** | **p_ANOVA_FDR** | **p_KW_FDR** |
| --- | --- | --- | --- | --- | --- | --- |
| **PC1** | Slide | 639 | 5.851 × 10-92 | 9.250 × 10-20 | 8.776 × 10-91 | 6.938 × 10-19 |
| **PC2** | Slide | 639 | 0.001 | 0.002 | 0.001 | 0.002 |
| **PC3** | Slide | 639 | 4.944 × 10-27 | 1.065 × 10-8 | 8.239 × 10-27 | 1.598 × 10-8 |
| **PC4** | Slide | 639 | 2.965 × 10-36 | 1.535 × 10-17 | 7.413 × 10-36 | 3.837 × 10-17 |
| **PC5** | Slide | 639 | 8.930 × 10-51 | 3.057 × 10-20 | 6.698 × 10-50 | 4.585 × 10-19 |
| **PC6** | Slide | 639 | 2.010 × 10-5 | 0.002 | 2.319 × 10-5 | 0.002 |
| **PC7** | Slide | 639 | 5.495 × 10-44 | 2.144 × 10-18 | 2.061 × 10-43 | 8.039 × 10-18 |
| **PC8** | Slide | 639 | 4.568 × 10-26 | 4.444 × 10-11 | 6.851 × 10-26 | 7.407 × 10-11 |
| **PC9** | Slide | 639 | 1.352 × 10-40 | 3.167 × 10-18 | 4.055 × 10-40 | 9.502 × 10-18 |
| **PC10** | Slide | 639 | 5.171 × 10-5 | 0.0002 | 5.541 × 10-5 | 0.0003 |
| **PC11** | Slide | 639 | 2.497 × 10-6 | 1.040 × 10-5 | 3.121 × 10-6 | 1.300 × 10-5 |
| **PC12** | Slide | 639 | 6.706 × 10-47 | 8.636 × 10-19 | 3.353 × 10-46 | 4.318 × 10-18 |
| **PC13** | Slide | 639 | 1.607 × 10-32 | 1.076 × 10-13 | 3.444 × 10-32 | 2.017 × 10-13 |
| **PC14** | Slide | 639 | 1.175 × 10-15 | 6.060 × 10-8 | 1.603 × 10-15 | 8.264 × 10-8 |
| **PC15** | Slide | 639 | 1.580 × 10-31 | 3.679 × 10-14 | 2.963 × 10-31 | 7.884 × 10-14 |

# **Table S2. Cox model results of epigenetic clocks**

# **A) Horvath**: Concordance: 0.652 | Likelihood ratio test p-value: 1 × 10-9

| **Variable** | **HR** | **95% CI** | **p-value** |
| --- | --- | --- | --- |
| SecondTertile | 1.413 | 0.98–2.04 | 0.065 |
| ThirdTertile | 1.998 | 1.39–2.88 | 0.00021 |
| PTGENDER | 1.084 | 0.79–1.48 | 0.62 |
| GENOTYPE | 2.049 | 1.66–2.53 | 2.6 × 10-11 |
| PTEDUCAT | 0.965 | 0.91–1.02 | 0.19 |
| Bcell | 0.003 | ~0–68 | 0.25 |
| NK | 6087 | ~0–5 × 108 | 0.13 |
| CD4T | 121 | ~0–1 × 106 | 0.30 |
| CD8T | 26.60 | ~0–3 × 105 | 0.49 |
| Mono | 723 | ~0–2 × 107 | 0.22 |
| Neu | 239 | ~0–1 × 106 | 0.22 |

# **B) skinHorvath**: Concordance: 0.662 | Likelihood ratio test p-value: 1 × 10-10

| **Variable** | **HR** | **95% CI** | **p-value** |
| --- | --- | --- | --- |
| SecondTertile | 1.676 | 1.15–2.45 | 0.0075 |
| ThirdTertile | 2.267 | 1.57–3.28 | 1.5 × 10-5 |
| PTGENDER | 1.038 | 0.76–1.42 | 0.82 |
| GENOTYPE | 2.062 | 1.67–2.55 | 2.7 × 10-11 |
| PTEDUCAT | 0.971 | 0.92–1.02 | 0.28 |
| Bcell | 0.0057 | ~0–147 | 0.32 |
| NK | 2755 | ~0–2.7 × 108 | 0.18 |
| CD4T | 83.9 | ~0–7 × 105 | 0.34 |
| CD8T | 20.3 | ~0–2 × 105 | 0.53 |
| Mono | 296 | ~0–1 × 107 | 0.30 |
| Neu | 159 | ~0–1 × 106 | 0.26 |

# **C) Hannum:** Concordance: 0.654 | Likelihood ratio test p-value: 1 × 10-9

| **Variable** | **HR** | **95% CI** | **p-value** |
| --- | --- | --- | --- |
| SecondTertile | 1.552 | 1.07–2.25 | 0.02 |
| ThirdTertile | 2.113 | 1.43–3.12 | 0.00017 |
| PTGENDER | 1.022 | 0.75–1.40 | 0.89 |
| GENOTYPE | 2.071 | 1.67–2.56 | 2.2 × 10-11 |
| PTEDUCAT | 0.966 | 0.92–1.02 | 0.21 |
| Bcell | 0.0020 | ~0–54 | 0.23 |
| NK | 425 | ~0–4 × 107 | 0.30 |
| CD4T | 84.9 | ~0–6 × 105 | 0.33 |
| CD8T | 21.0 | ~0–2 × 105 | 0.52 |
| Mono | 123 | ~0–5 × 106 | 0.38 |
| Neu | 77.0 | ~0–5 × 105 | 0.33 |

# **D)** **Levine**: Concordance: 0.654 | Likelihood ratio test p-value: 2 × 10-9

| **Variable** | **HR** | **95% CI** | **p-value** |
| --- | --- | --- | --- |
| SecondTertile | 1.433 | 0.97–2.11 | 0.069 |
| ThirdTertile | 2.025 | 1.36–3.01 | 0.00049 |
| PTGENDER | 1.051 | 0.77–1.44 | 0.76 |
| GENOTYPE | 2.022 | 1.64–2.49 | 4.3 × 10-11 |
| PTEDUCAT | 0.970 | 0.92–1.02 | 0.27 |
| Bcell | 0.0014 | ~0–44 | 0.21 |
| NK | 239 | ~0–2 × 107 | 0.36 |
| CD4T | 42.9 | ~0–3 × 105 | 0.41 |
| CD8T | 16.4 | ~0–2 × 105 | 0.56 |
| Mono | 91.3 | ~0–4 × 106 | 0.41 |
| Neu | 42.4 | ~0–3 × 105 | 0.41 |

# **E)** **BLUP**: Concordance: 0.662 | Likelihood ratio test p-value: 1 × 10-10

| **Variable** | **HR** | **95% CI** | **p-value** |
| --- | --- | --- | --- |
| SecondTertile | 1.577 | 1.08–2.30 | 0.017 |
| ThirdTertile | 2.284 | 1.57–3.33 | 1.7 × 10-5 |
| PTGENDER | 1.027 | 0.75–1.41 | 0.87 |
| GENOTYPE | 2.060 | 1.67–2.55 | 2.1 × 10-11 |
| PTEDUCAT | 0.976 | 0.93–1.03 | 0.38 |
| Bcell | 0.015 | ~0–388 | 0.42 |
| NK | 7026 | ~0–7 × 108 | 0.13 |
| CD4T | 294 | ~0–2 × 106 | 0.22 |
| CD8T | 91.4 | ~0–1 × 106 | 0.34 |
| Mono | 416 | ~0–1 × 107 | 0.27 |
| Neu | 511 | ~0–3 × 106 | 0.17 |

# **F)** **EN**:Concordance: 0.654 | Likelihood ratio test p-value: 8 × 10-10

| **Variable** | **HR** | **95% CI** | **p-value** |
| --- | --- | --- | --- |
| SecondTertile | 1.332 | 0.91–1.95 | 0.14 |
| ThirdTertile | 2.058 | 1.41–3.00 | 0.00018 |
| PTGENDER | 1.019 | 0.74–1.40 | 0.91 |
| GENOTYPE | 2.083 | 1.68–2.58 | 1.7 × 10-11 |
| PTEDUCAT | 0.966 | 0.92–1.02 | 0.21 |
| Bcell | 0.0015 | ~0–43 | 0.21 |
| NK | 341 | ~0–3 × 107 | 0.32 |
| CD4T | 43.7 | ~0–3 × 105 | 0.41 |
| CD8T | 16.6 | ~0–2 × 105 | 0.55 |
| Mono | 72.9 | ~0–3 × 106 | 0.43 |
| Neu | 75.2 | ~0–5 × 105 | 0.34 |

# **G)** **DunedinPACE**: Concordance: 0.653 | Likelihood ratio test p-value: 2 × 10-8

| **Variable** | **HR** | **95% CI** | **p-value** |
| --- | --- | --- | --- |
| SecondTertile | 0.955 | 0.66–1.38 | 0.81 |
| ThirdTertile | 1.532 | 1.07–2.20 | 0.02 |
| PTGENDER | 1.027 | 0.75–1.41 | 0.87 |
| GENOTYPE | 2.010 | 1.63–2.48 | 7.8 × 10-11 |
| PTEDUCAT | 0.960 | 0.91–1.01 | 0.14 |
| Bcell | 0.011 | ~0–358 | 0.39 |
| NK | 6411 | ~0–7 × 108 | 0.14 |
| CD4T | 380 | ~0–4 × 106 | 0.21 |
| CD8T | 250 | ~0–3 × 106 | 0.25 |
| Mono | 6572 | ~0–2 × 108 | 0.10 |
| Neu | 687 | ~0–5 × 106 | 0.15 |

# **H) GrimAge**: Concordance: 0.659 | Likelihood ratio test p-value: 2 × 10-11

| **Variable** | **HR** | **95% CI** | **p-value** |
| --- | --- | --- | --- |
| SecondTertile | 2.189 | 1.49–3.22 | 7.2 × 10-5 |
| ThirdTertile | 2.556 | 1.69–3.87 | 9 × 10-6 |
| PTGENDER | 1.137 | 0.83–1.56 | 0.42 |
| GENOTYPE | 2.151 | 1.73–2.67 | 4.8 × 10-12 |
| PTEDUCAT | 0.976 | 0.92–1.03 | 0.37 |
| Bcell | 0.12 | ~0–3302 | 0.68 |
| NK | 12600 | ~0–1 × 109 | 0.11 |
| CD4T | 412 | ~0–3 × 106 | 0.19 |
| CD8T | 189 | ~0–2 × 106 | 0.27 |
| Mono | 265 | ~0–1 × 107 | 0.30 |
| Neu | 427 | ~0–2 × 106 | 0.18 |

# **Table S3. Methylation status at the single CpG level and conversion**

| **CpG** | **SD_cpg** | **HR_per_SD** | **lower_95_SD** | **upper_95_SD** | **p_value** | **FDR** | **log2HR** | **neglog10** | **CI95_SD** |
| --- | --- | --- | --- | --- | --- | --- | --- | --- | --- |
| cg11863237 | 0.015 | 1.293 | 1.181 | 1.415 | 2.34 × 10-8 | 0.014 | 0.371 | 7.630 | [1.18 - 1.41] |
| cg24953682 | 0.021 | 0.769 | 0.700 | 0.844 | 3.58 × 10-8 | 0.014 | -0.380 | 7.447 | [0.7 - 0.84] |
| cg14031964 | 0.027 | 0.755 | 0.682 | 0.836 | 6.31 × 10-8 | 0.016 | -0.405 | 7.200 | [0.68 - 0.84] |
| cg02408252 | 0.045 | 0.726 | 0.645 | 0.818 | 1.27 × 10-7 | 0.024 | -0.461 | 6.895 | [0.65 - 0.82] |
| cg09701580 | 0.027 | 0.730 | 0.649 | 0.822 | 1.72 × 10-7 | 0.026 | -0.453 | 6.764 | [0.65 - 0.82] |
| cg26306080 | 0.027 | 0.762 | 0.688 | 0.845 | 2.23 × 10-7 | 0.028 | -0.391 | 6.652 | [0.69 - 0.84] |
| cg22034077 | 0.038 | 0.740 | 0.658 | 0.833 | 6.51 × 10-7 | 0.071 | -0.434 | 6.187 | [0.66 - 0.83] |
| cg08502322 | 0.031 | 0.612 | 0.503 | 0.746 | 1.09 × 10-6 | 0.092 | -0.708 | 5.962 | [0.5 - 0.75] |
| cg22685718 | 0.036 | 1.285 | 1.162 | 1.421 | 1.02 × 10-6 | 0.092 | 0.362 | 5.990 | [1.16 - 1.42] |
| cg03551964 | 0.032 | 1.273 | 1.154 | 1.405 | 1.52 × 10-6 | 0.115 | 0.348 | 5.819 | [1.15 - 1.4] |
| cg16887640 | 0.026 | 0.702 | 0.608 | 0.812 | 1.73 × 10-6 | 0.120 | -0.510 | 5.762 | [0.61 - 0.81] |
| cg13629345 | 0.018 | 1.273 | 1.152 | 1.406 | 2.16 × 10-6 | 0.126 | 0.348 | 5.666 | [1.15 - 1.41] |
| cg04709185 | 0.037 | 0.553 | 0.433 | 0.707 | 2.13 × 10-6 | 0.126 | -0.853 | 5.672 | [0.43 - 0.71] |
| cg04170192 | 0.007 | 1.482 | 1.258 | 1.748 | 2.79 × 10-6 | 0.135 | 0.568 | 5.554 | [1.26 - 1.75] |
| cg03142905 | 0.024 | 0.803 | 0.732 | 0.881 | 3.52 × 10-6 | 0.135 | -0.316 | 5.453 | [0.73 - 0.88] |
| cg18002339 | 0.023 | 0.782 | 0.706 | 0.867 | 3.09 × 10-6 | 0.135 | -0.354 | 5.510 | [0.71 - 0.87] |
| cg14684108 | 0.025 | 0.673 | 0.570 | 0.796 | 3.54 × 10-6 | 0.135 | -0.570 | 5.451 | [0.57 - 0.8] |
| cg06316563 | 0.026 | 0.736 | 0.647 | 0.837 | 3.10 × 10-6 | 0.135 | -0.442 | 5.509 | [0.65 - 0.84] |
| cg04547809 | 0.007 | 0.770 | 0.690 | 0.860 | 3.23 × 10-6 | 0.135 | -0.376 | 5.491 | [0.69 - 0.86] |
| cg16744168 | 0.045 | 0.734 | 0.645 | 0.836 | 3.20 × 10-6 | 0.135 | -0.446 | 5.494 | [0.64 - 0.84] |
| cg26580895 | 0.013 | 1.339 | 1.182 | 1.518 | 4.74 × 10-6 | 0.157 | 0.421 | 5.324 | [1.18 - 1.52] |
| cg02461883 | 0.037 | 1.275 | 1.149 | 1.414 | 4.45 × 10-6 | 0.157 | 0.350 | 5.351 | [1.15 - 1.41] |
| cg00360679 | 0.036 | 0.758 | 0.673 | 0.853 | 4.63 × 10-6 | 0.157 | -0.400 | 5.334 | [0.67 - 0.85] |

# **Table S4**. **Methylation status at the single CpG level and cognitive decline**

| **CpG_Continuous_MMSE** | **beta** | **SE** | **t_value** | **p_value** | **R2** | **FDR** |
| --- | --- | --- | --- | --- | --- | --- |
| **cg04547809** | 1.378 | 0.469 | 2.937 | 0.003 | 0.069 | ~1.000 |
| **cg04709185** | 2.082 | 0.807 | 2.579 | 0.010 | 0.066 | ~1.000 |
| **cg16744168** | 1.553 | 0.759 | 2.046 | 0.041 | 0.063 | ~1.000 |
| **cg08502322** | 1.401 | 0.703 | 1.993 | 0.047 | 0.062 | ~1.000 |
| cg24953682 | 0.921 | 0.477 | 1.929 | 0.054 | 0.062 | ~1.000 |
| cg22685718 | -0.886 | 0.464 | -1.911 | 0.057 | 0.062 | ~1.000 |
| cg02408252 | 0.635 | 0.364 | 1.746 | 0.081 | 0.061 | ~1.000 |
| cg26306080 | 0.768 | 0.574 | 1.339 | 0.181 | 0.059 | ~1.000 |
| cg11863237 | -0.772 | 0.676 | -1.142 | 0.254 | 0.058 | ~1.000 |
| cg02461883 | -0.410 | 0.366 | -1.120 | 0.263 | 0.058 | ~1.000 |
| cg22034077 | 0.566 | 0.535 | 1.057 | 0.291 | 0.058 | ~1.000 |
| cg13629345 | -0.329 | 0.390 | -0.845 | 0.398 | 0.057 | ~1.000 |
| cg03142905 | 0.329 | 0.395 | 0.833 | 0.405 | 0.057 | ~1.000 |
| cg06316563 | 0.517 | 0.669 | 0.772 | 0.440 | 0.057 | ~1.000 |
| cg14031964 | 0.234 | 0.310 | 0.757 | 0.449 | 0.057 | ~1.000 |
| cg03551964 | -0.297 | 0.480 | -0.618 | 0.537 | 0.057 | ~1.000 |
| cg14684108 | 0.369 | 0.723 | 0.510 | 0.610 | 0.057 | ~1.000 |
| cg04170192 | -0.344 | 0.740 | -0.465 | 0.642 | 0.056 | ~1.000 |
| cg18002339 | 0.188 | 0.425 | 0.442 | 0.659 | 0.056 | ~1.000 |
| cg16887640 | -0.124 | 0.610 | -0.203 | 0.839 | 0.056 | ~1.000 |
| cg26580895 | 0.008 | 0.576 | 0.014 | 0.989 | 0.056 | ~1.000 |
| cg09701580 | 0.003 | 0.632 | 0.004 | 0.996 | 0.056 | ~1.000 |
| cg00360679 | -0.001 | 0.581 | -0.002 | 0.999 | 0.056 | ~1.000 |

# **Table S5**. **CpG methylation and plasma biomarker associations**

| **Marker** | **N_samples** | **N_FDR_sig_CpGs** | **Top_P** | **Top_FDR** |
| --- | --- | --- | --- | --- |
| pT217_F | 40 | 11 | 4.93 × 10-8 | 0.019 |
| AB42_F | 40 | 0 | 1.84 × 10-6 | ~1.000 |
| AB40_F | 40 | 0 | 2.82 × 10-6 | ~1.000 |
| AB42_AB40_F | 40 | 0 | 4.94 × 10-7 | 0.331 |
| pT217_AB42_F | 40 | 0 | 1.38 × 10-7 | 0.105 |
| NfL_Q | 40 | 0 | 6.31 × 10-6 | ~1.000 |
| GFAP_Q | 40 | 0 | 4.65 × 10-6 | 0.982 |

# **Table S6**. **CpG methylation and plasma p-tau217 associations**

# **A) Epigenome-wide association analysis**: R2: 0.807 | Adjusted R2: 0.732 | F-statistic p-value: 2.43 × 10-7

| **Variable** | **Estimate** | **Std Error** | **p-value** |
| --- | --- | --- | --- |
| Intercept | 1.331 | 0.536 | 0.0193 |
| cg15992932 | 0.243 | 0.081 | 0.0055 |
| cg05774141 | -0.265 | 0.102 | 0.0151 |
| cg09957712 | -0.059 | 0.094 | 0.532 |
| cg14830287 | 0.088 | 0.194 | 0.653 |
| cg26288595 | 0.183 | 0.096 | 0.066 |
| cg05622569 | -0.046 | 0.170 | 0.788 |
| cg27264172 | 0.142 | 0.188 | 0.456 |
| cg08832596 | -0.115 | 0.067 | 0.095 |
| cg03039559 | -0.048 | 0.180 | 0.792 |
| cg02104112 | -0.029 | 0.106 | 0.790 |
| cg09788949 | 0.025 | 0.201 | 0.904 |

# **B)** **Multivariable linear regression model**: R2: 0.887 | Adjusted R2: 0.755 | F-statistic p-value: 7.33 × 10-5

| **Variable** | **Estimate** | **Std Error** | **p-value** |
| --- | --- | --- | --- |
| Intercept | 2.457 | 4.287 | 0.574 |
| cg15992932 | 0.276 | 0.114 | 0.0259 |
| cg05774141 | -0.179 | 0.136 | 0.206 |
| cg09957712 | -0.060 | 0.118 | 0.617 |
| cg14830287 | -0.180 | 0.247 | 0.475 |
| cg26288595 | 0.153 | 0.103 | 0.156 |
| cg05622569 | 0.042 | 0.186 | 0.825 |
| cg27264172 | 0.070 | 0.244 | 0.778 |
| cg08832596 | -0.083 | 0.081 | 0.318 |
| cg03039559 | -0.032 | 0.225 | 0.888 |
| cg02104112 | 0.013 | 0.128 | 0.919 |
| cg09788949 | 0.114 | 0.294 | 0.703 |
| Age | -0.003 | 0.008 | 0.722 |
| PTGENDER | 0.074 | 0.149 | 0.623 |
| GENOTYPE | 0.187 | 0.096 | 0.0677 |
| PTEDUCAT | -0.011 | 0.016 | 0.497 |

# **B) (Cont.) Multivariable linear regression model**: R2: 0.887 | Adjusted R2: 0.755 | F-statistic p-value: 7.33 × 10-5

| **Variable** | **Estimate** | **Std Error** | **p-value** |
| --- | --- | --- | --- |
| Bcell | -0.260 | 4.317 | 0.953 |
| NK | -0.997 | 4.481 | 0.827 |
| CD4T | -2.795 | 4.204 | 0.515 |
| CD8T | -3.259 | 4.579 | 0.486 |
| Mono | 1.495 | 4.604 | 0.749 |
| Neu | -0.827 | 4.229 | 0.847 |
